# Supplementary material for: Characterization of hotspot exonuclease domain mutations in the DNA polymerase ϵ gene in endometrial cancer
Source: PubMed Central journal article supplement (PMC9596989; doi:10.3389/fonc.2022.1018034), 2022-10-12
Supplement: DataSheet_1.pdf [file DataSheet_1.pdf]

## Supplementary Table

### 1 Primers for *POLE* sequencing.

---

| Number | Forward                  | Reverse                  |
|--------|--------------------------|--------------------------|
| seq01  | ATGTAAATCAGAAATGCAGACACC | CACAAATACACAGTGACAACCTAG |
| seq02  | CTCTATCAGCCTCAGGAAAACAAG | CAAAGACACGAGCCTCCTG      |
| seq03  | CACCTGTTTGCATGGAGAAATG   | CAGTGAGCCAAAAGTGAGGTG    |
| seq04  | TAGGTGCCCTAGTTCTTTGTC    | AAAATCCAGATTCTCACGGGTTAG |
| seq05  | AGGATGTGGCCCTGGC         | CCAGGGGCTTTTCCTCCC       |
| seq06  | TCTGCGTCCGTGCCAG         | CTGCTTCTTCAGGTGCTCTG     |
| seq07  | CTCCTCTCTGAGTGGACTGG     | GATGTGGCCTTGGCATCAG      |
| seq08  | CTTACTGATGGGCCACGAATG    | CGAGGCAGATGAGGGAGAG      |
| seq09  | ACTGTGGTCTGGAGGCTG       | ACTCCAGGGCACACGG         |
| seq10  | GAATAAGCTGAACCGAGACCTG   | CTCGGATGTTCTGCTCCAC      |
| seq11  | TCTAAAGGGACTAAGGAAGGGAG  | GAACTCGCCGACATCCAC       |
| seq12  | TCTCAGGATTATGTCGCAAATGAG | TACGTTAGTGTCTCTCCTCACAC  |
| seq13  | GTGAGCAGTCTTTTGTCTTTTGAG | ATCTTCTGAGTGATGGTGAAGAAG |
| seq14  | CTCAGATTCTAGGGTGTTCGAG   | CTCAAAGACAAAAGACTGCTCAC  |

---

---

|              |                          |                          |
|--------------|--------------------------|--------------------------|
| <b>seq15</b> | CAGAGGATGAGCAGGAAAATGAG  | CATCTACTAACCATGAGTCCCTTC |
| <b>seq16</b> | GACTGCGAGGAAGGCCTC       | CTCCTCCTCCCCATCTCTTTC    |
| <b>seq17</b> | AGAACAAGGTCGATTTCACTGAAG | CAAAGCTGGCTCGGGTG        |
| <b>seq18</b> | TCTGGCTCTCCATGACTGTG     | GTCACCAGGACCAGCCAG       |
| <b>seq19</b> | TGAAGGAGATCACCCAGTACC    | ATGTCTCTGGTTCTGGGGAGTAAG |
| <b>seq20</b> | GACAGTGACGGATTTGGACC     | GTAGAAGTGCATCACCTGGTTG   |
| <b>seq21</b> | CATTCTCCAGTCTCACCATGTC   | AATTAAGGGCAAAGGATAAGACCC |
| <b>seq22</b> | GTCTGTTGCTGGTTCTGGAG     | GATCACGTCGAAGCTGATCC     |
| <b>seq23</b> | CTACCAGAGGACATCTCCACATTC | CTCATGGGCCTCGTCCTC       |
| <b>seq24</b> | TCGCAGGCCTTCGAGATG       | GCAAAGAAGAGGTCGGAGC      |
| <b>seq25</b> | CACACTCATCGCTGTTCAAGTC   | CAACGACAGTACTGTGCTCAC    |
| <b>seq26</b> | GAAACTGACCTGAAGACCATCTG  | TCCAAGACAGGAATTTCACTGG   |
| <b>seq27</b> | CTGTACTCAGCAGAGCACG      | TCAAGGCAAATGGAAGAAAAGAC  |
| <b>seq28</b> | GAGTGCTTGTCGTGATTGAATTG  | CGAACTTCGAAGGTGTGTTTG    |
| <b>seq29</b> | CAGCCGCCCATCATGTG        | CAATGTGCTGCCATGGAGG      |
| <b>seq30</b> | CACCATCCAGCCCTTGC        | CACATGATGGGCGGCTG        |
| <b>seq31</b> | GTCGTATTCTCGCCAGGTAAATC  | GTTTCTTTCCTCCATACCACCC   |

---

---

|              |                           |                          |
|--------------|---------------------------|--------------------------|
| <b>seq32</b> | TTGTAATCATTGAGAGAGGTGGAC  | CTCTGGCACTGAATACTCATAGAG |
| <b>seq33</b> | CTTTCAGATCAGCGAGACCAG     | CAGGCTAGATCATGGGAAAGC    |
| <b>seq34</b> | CCTGAGGTCTGGGATGGG        | GCCACAGCCTGAACAG         |
| <b>seq35</b> | GTCTGGAGTCGGCAGAGG        | CTCTAACCTCCCATCCCAG      |
| <b>seq36</b> | GCTGCTTGTGAGAAAGTCATG     | GCAGGACCATCCCGGATG       |
| <b>seq37</b> | CGAGGCCAAGTGCTCCTG        | CCTCAGAGACAGACAGTATCACAG |
| <b>seq38</b> | GTTACCCAGGCTGGTCTCAAACCTC | GTGAGGCAGCTTTACGAGG      |
| <b>seq39</b> | ACAAGGGTCTCTCTCTGATGG     | GTCCTGTGTGTCACAAGGATC    |
| <b>seq40</b> | TAAATAAGACACAGTGGTTAGCCC  | ACAGTTTTTTAGCCCCACAGC    |
| <b>seq41</b> | TAAGAGTTAGGATCAGATTTTGGG  | TTTAAGAGTAGAGAACGCAACTGG |
| <b>seq42</b> | CATCTCTGAGAACCGTTCCATG    | CTCACCTCTCCGTGATGGG      |
| <b>seq43</b> | ATTAGAGAGCTCTTGAAATTGCAG  | TAGACTTCTGCTCCCCGTAATC   |
| <b>seq44</b> | TCAAGGGCTTTGAGGTCAAAC     | CTTCTTGCTTCATCCTTCATCCC  |
| <b>seq45</b> | AGAGAGGATGAGGCACAGC       | TACAGAGCCATACACCTCTTCC   |
| <b>seq46</b> | TCTTCACTCTTGTTTCTCAGGAAG  | CAATCCATGTCCTTTCTAAAGCAC |
| <b>seq47</b> | ATGCATCAGAACTTCCTTCCTTC   | CGTAGGTGAGTGAGGACGG      |
| <b>seq48</b> | CTTGCTCCTCTCTTTCTCTGAAG   | CAGAGCTTCAGGACCAGAGG     |

---

---

|              |                          |                          |
|--------------|--------------------------|--------------------------|
| <b>seq49</b> | TCTGATACCCCCTGGAGGAG     | CCTCCCTCCTTCCTTCCTG      |
| <b>seq50</b> | CTTCTCAGGTGTGGAAAAGAAG   | GACTCATCCATTCTCCATAAG    |
| <b>seq51</b> | AATGTACACTCTTCATTGTACTGG | ATACAGCACCTCCATGTTCTTG   |
| <b>seq52</b> | CATCTCCGTCGTGCTTAGATTAC  | CTGAAACTGCCCTCACAGAG     |
| <b>seq53</b> | CAAAGTGCTGGGATTACAGGTG   | ATGTGGATCTTCTGTAGGCTTTC  |
| <b>seq54</b> | TCTGTGCCTCCTTTTGAAGTTG   | ATCTTTACAGCCGTGACCATG    |
| <b>seq55</b> | CTTTACTTCCCGTGTGTCAGAGTC | ACACTCACCCACCCGTTTC      |
| <b>seq56</b> | GAAGTGCACACGAGGCAAG      | CTGACACGGGAAGTAAAGTCTC   |
| <b>seq57</b> | GCTAGTGTGGGTGTGTTTCC     | CCAAACACAGACTGGCTCTTC    |
| <b>seq58</b> | CTTCCACGCCAACATCATCTTC   | ACAAGAGTGGGAAGAATCTGAATC |
| <b>seq59</b> | TTCTCTCCTTTCACACTGAAGTTC | TTATTGAACTCCTGCTCTTGCTTG |
| <b>seq60</b> | CTCTTGATTTTTGATGGCCCTG   | AGCTCCAGTGCATTTGGAATG    |
| <b>seq61</b> | TTAGAATCATCCTGGCTTCTGTTC | CATCTGGATGCGTGCACAC      |
| <b>seq62</b> | ACTTGCTTGTCTGTCCTCTTTC   | CTGCAAGAGGCCTTCAGATC     |
| <b>seq63</b> | TCTGAACTTTGGGAGAGGAATTTG | CTGCCAGTTACTCATAGAGAAG   |
| <b>seq64</b> | GTGGGAACGCCATTTCTTG      | GGTAGTTTCCAAGTGATACCTC   |
| <b>seq65</b> | GGTGGGTGTTTCAGGGAGG      | CAGGAGCTTACTTCCCAGAAG    |

---

---

|              |                           |                          |
|--------------|---------------------------|--------------------------|
| <b>seq66</b> | ATGGGTGAATCCACAGAAGAATAG  | ACTCTCCAGCACTGAAGAATATTC |
| <b>seq67</b> | CAGCTGAGTTAGTTGCTCTCTTG   | CTGTTAGGAAATTCATGTGAGCAG |
| <b>seq68</b> | CTATTTCTCTTGAACCAATGAGCG  | TTTGCTCACAAGACCAAAGTTTAC |
| <b>seq69</b> | GGCAAGGAAGGAAATGTATTTTACC | AATGTAGACTCTGGCCTCATTAC  |
| <b>seq70</b> | CATTCTGACTTCCTGTATGCTACC  | GACCTGAGTCTATGAAACACACTC |
| <b>seq71</b> | TTGTTTCTAAAGTGCTGAGTTTCC  | TTTAGCTTGTCGCAGTCAGGG    |
| <b>seq72</b> | CTTCTTTCACTCAGGGATGATGG   | TTTAGATAAGGACCACGCTATGAC |
| <b>seq73</b> | CAGGAGAATGGCGTGAACC       | GAGTGCCGAAACTGAGGAAG     |
| <b>seq74</b> | GATGGACGGCGGCATTTTC       | ATGGCACCCCTCCGGAG        |
| <b>seq75</b> | TCCCAACCCACGGTG           | CTCTGCTTCAGGGGAGAAATTTG  |
| <b>seq76</b> | ACCCACCTCAGGCTG           | CGAGGCGCTCCAATTGG        |

---

## 2 Primers for plasmid construction.

---

| Primers | Sequences (5'-3') |
|---------|-------------------|
|---------|-------------------|

---

### H\_*POLE* WT

Primer-F1 TTGGTACCGAGCTCGGATCCGCCACCATGTCTCTGAGGAGCGGCG

Primer-R1 AATAATAGTCAACAGCGCTACCTAAGCGCTTATCTTCATCTAAAATCTCG

Primer-F2 TAGCGCTGTTGACTATTATTTTATTCAAGATGACGGAAGCAGATTTAAGG

Primer-R2 GCTGGATATCTGCAGAATTCCTAATGGCCCAGCTGTGGGT

### H\_*POLE*-P286R

Primer-F1 TTGGTACCGAGCTCGGATCCGCCACCATGTCTCTGAGGAGCGGCG

Primer-R1 GTCTCAGCATCTCGAAACTTGAGGGGCAGTTTGGTC

Primer-F2 AAGTTTCGAGATGCTGAGACAGACCAGATTATGATGA

Primer-R2 GCTGGATATCTGCAGAATTCCTAATGGCCCAGCTGTGGGT

### H\_*POLE*-V411L

Primer-F1 TTGGTACCGAGCTCGGATCCGCCACCATGTCTCTGAGGAGCGGCG

Primer-R1 TCTTGAGCCACCTGAGGCAGTCCATGTG

Primer-F2 CTGCCTCAGGTGGCTCAAGAGGGACAGTTACCTTCCTGTGG

Primer-R2 GCTGGATATCTGCAGAATTCCTAATGGCCCAGCTGTGGGT

H\_ *POLE*-R375Q

Primer-F1 TTGGTACCGAGCTCGGATCCGCCACCATGTCTCTGAGGAGCGGCG

Primer-R1 AGACCGTGGACTGCTGCCTGGGCCTCCACAAATGGCCA

Primer-F2 AGGCAGCAGTCCACGGTCTG

Primer-R2 GCTGGATATCTGCAGAATTCCTAATGGCCCAGCTGTGGGT

H\_ *POLE*-P452L

Primer-F1 TTGGTACCGAGCTCGGATCCGCCACCATGTCTCTGAGGAGCGGCG

Primer-R1 GCCAGAGTCTGCAGCTGCTCCGTGGCCATCCG

Primer-F2 AGCAGCTGCAGACTCTGGCCACGTATTCTGTG

Primer-R2 GCTGGATATCTGCAGAATTCCTAATGGCCCAGCTGTGGGT

---

**3 shRNA sequences against *POLE*.**

---

| shRNA  | Sequence (5'-3')      |
|--------|-----------------------|
| shRNA1 | GCAGTGCAGTGGATTACTACT |
| shRNA2 | GCTGAGACAGACCAGATTATG |
| shRNA3 | GCTCTTCCCTTCAAGACTTTG |
| shRNA4 | GGGAATTTCTTCTCTGGATGG |

---



#### 4 Quantitative real-time PCR primers

---

| Gene    | Sequence (5'-3')        |
|---------|-------------------------|
| GAPDH-F | GTCTCCTCTGACTTCAACAGCG  |
| GAPDH-R | ACCACCCTGTTGCTGTAGCCAA  |
| POLE-F  | GGTGGGTGAAGAGGGACAGTTA  |
| POLE-R  | AGGTAGTAAGTGGCGACAGCATC |
| MLH1-F  | CTTCGTGGGCTGTGTGAATCC   |
| MLH1-R  | CTAAGGCAAGCATGGCAAGGTC  |
| MSH2-F  | GATCATCACTTCGGTGGTCAGT  |
| MLH2-R  | GCCATTACAGGTGCATCAACAG  |

---
